# Supplementary material
Source: MDPI journal article supplement (https://www.mdpi.com/2073-4395/11/10/2033)
Supplement: s1 [file s1]

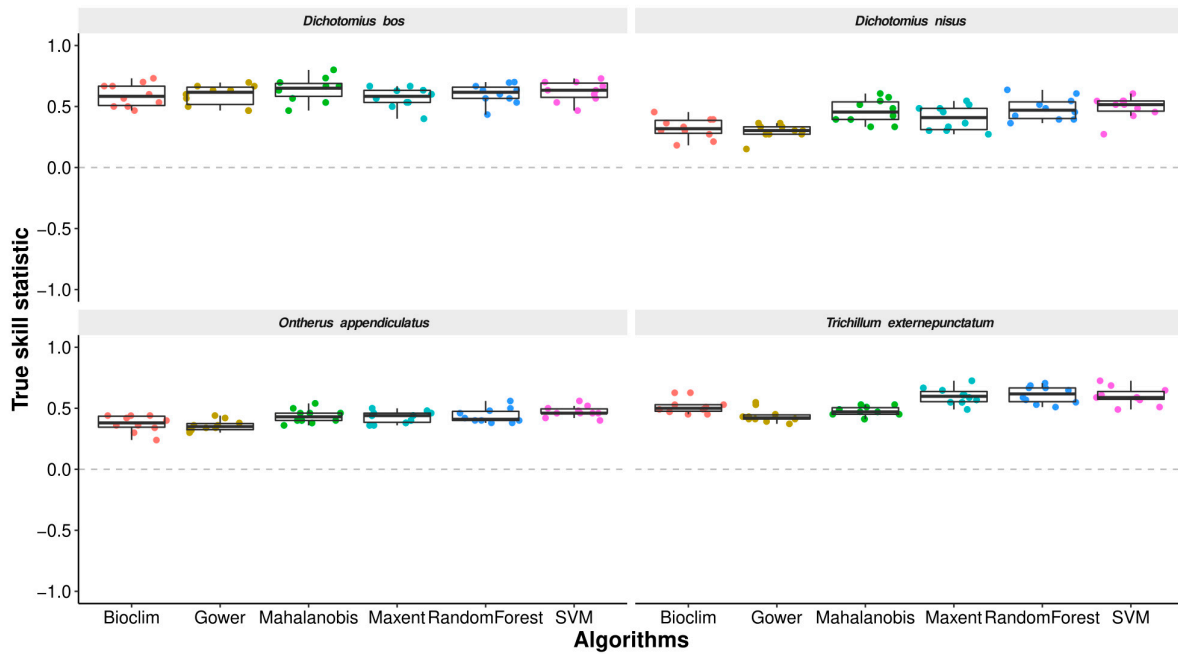

**Figure S1.** True skill statistic (TSS) values for niche-based modeling of *Dichotomius bos*, *Dichotomius nisus*, *Ontherus appendiculatus* and *Trichillum externepunctatum*.

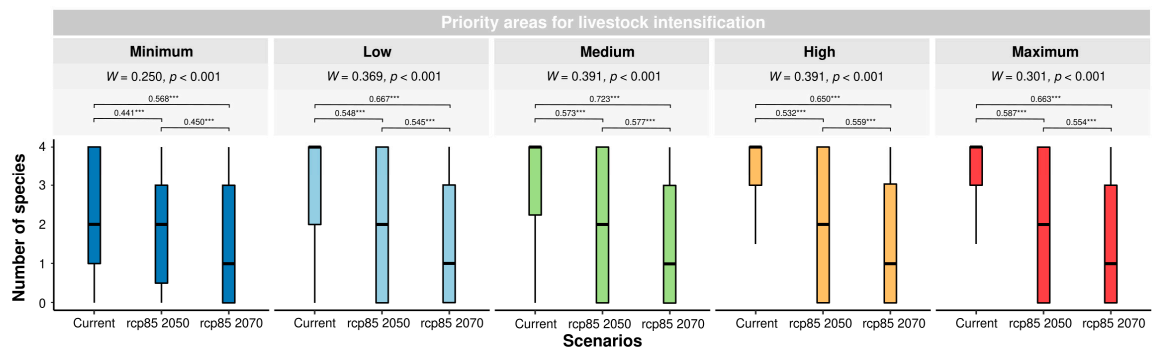

**Figure S2.** Number of key dung beetle species on priority areas for livestock intensification (*sensu* Barbosa et al., 2015) in the Present, 8.5 RCP 2050 and 2070 scenarios. \*\*\* Indicate pairwise significance of  $p < 0.001$  between scenarios.

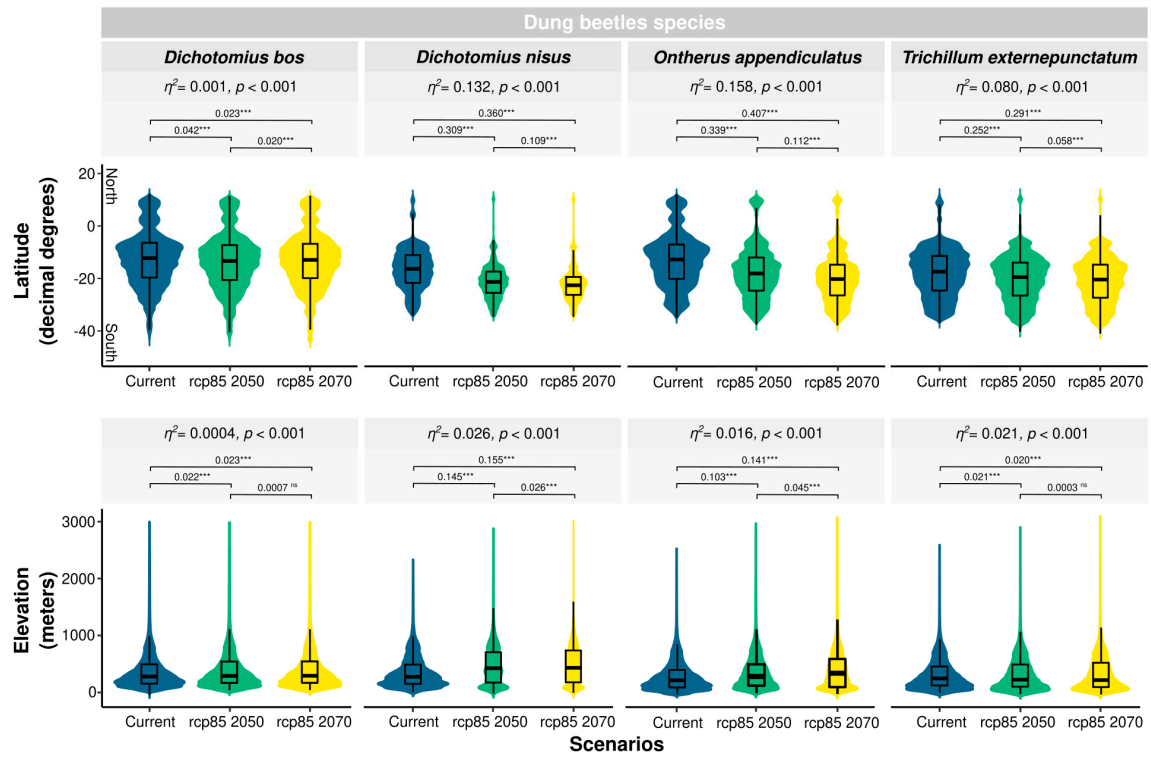

**Figure S3.** Effects of future climate change across latitude and elevation for dung beetles. \*\*\* Indicate pairwise significance of  $p < 0.001$  between scenarios.
